# Supplementary material for: Rapid development and use of patient-specific ctDNA biomarkers to avoid a “rash decision” in an ovarian cancer patient
Source: PubMed Central journal article supplement — Cold Spring Harb Mol Case Stud. 2019 Dec;5(6):a004648. doi: 10.1101/mcs.a004648 (PMC6913138; doi:10.1101/mcs.a004648), 2019-12
Supplement: supp_mcs.a004648_Supplemental_Figure_S1.pdf [file supp_mcs.a004648_Supplemental_Figure_S1.pdf]

S1 Fig.

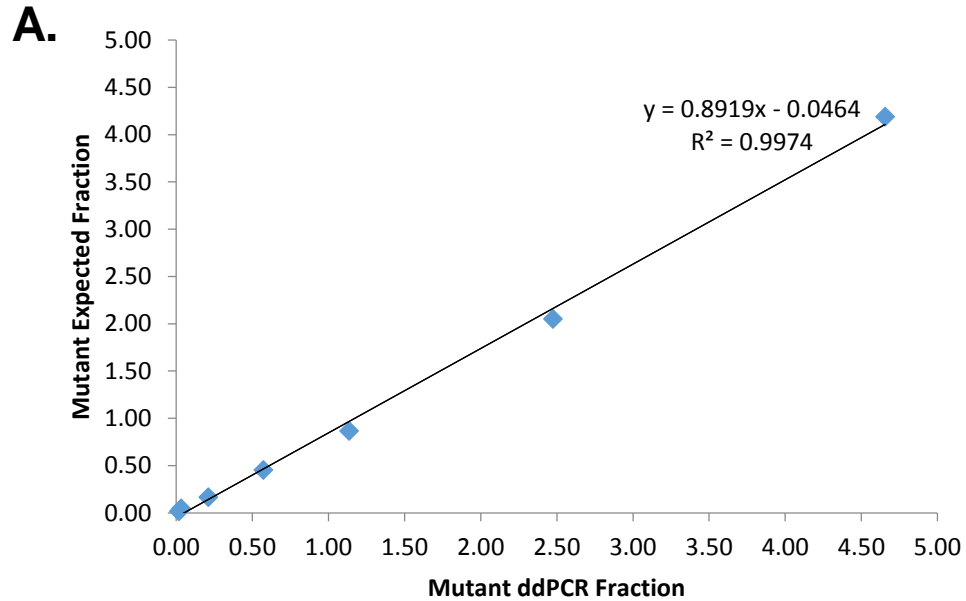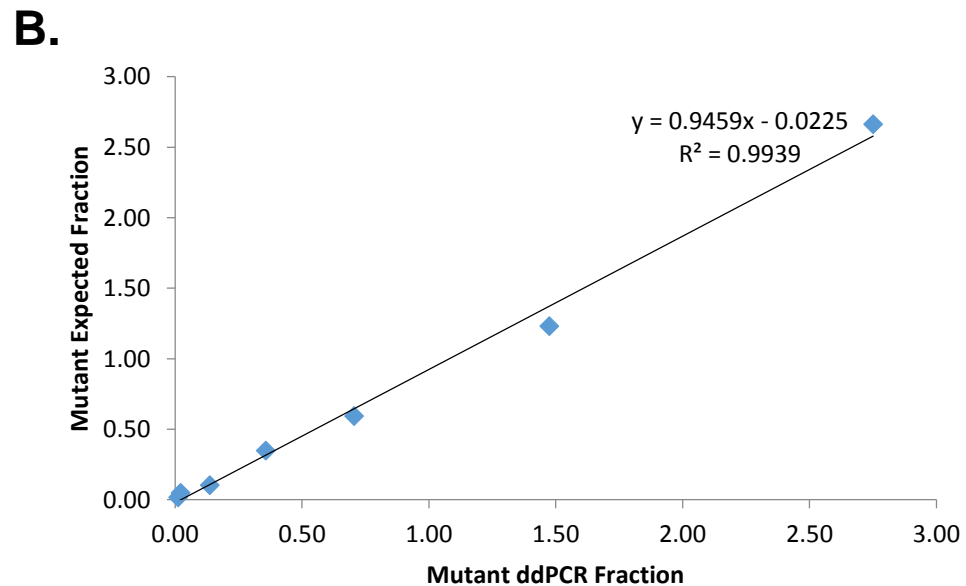

**S1 Fig.** DdPCR assay linearity and accuracy determination for ctDNA detection and quantification: TP53 mutation; Chr17: 7577535; G>A and PTEN mutation; Chr10: 89717717; C>T. Assay linearity was determined by analyzing serial dilutions of tumor allele fraction. The lower limit of detection for each assay was established by spiking serial tumor DNA dilutions in a base of 50,000 genome equivalents from the patient's germline DNA. Mutation fraction was detected as low as 0.02% for each assay. For both assays, the mutant copies detected by the ddPCR system were supported by an  $R^2$  of 0.99. (A) TP53 mutation; Chr17: 7577535; G>A (B) PTEN mutation; Chr10: 89717717; C>T
